# Supplementary material for: A 15-min non-competitive homogeneous assay for microcystin and nodularin based on time-resolved Förster resonance energy transfer (TR-FRET)
Source: PubMed Central journal article supplement (PMC8440290; doi:10.1007/s00216-021-03375-8), 2021-06-03
Supplement: 216_2021_3375_MOESM1_ESM.pdf [file 216_2021_3375_MOESM1_ESM.pdf]

Analytical and Bioanalytical Chemistry

**Electronic Supplementary Material**

Article title:

**A 15-min non-competitive homogeneous assay for microcystin and nodularin based on time-resolved Förster resonance energy transfer (TR-FRET)**

**Authors:** Sultana Akter and Urpo Lamminmäki (urplammi@utu.fi)

**Author affiliation:**

Biotechnology, Department of Life Technologies, Faculty of Technology, University of Turku, FI-20520 Turku, Finland.

**a**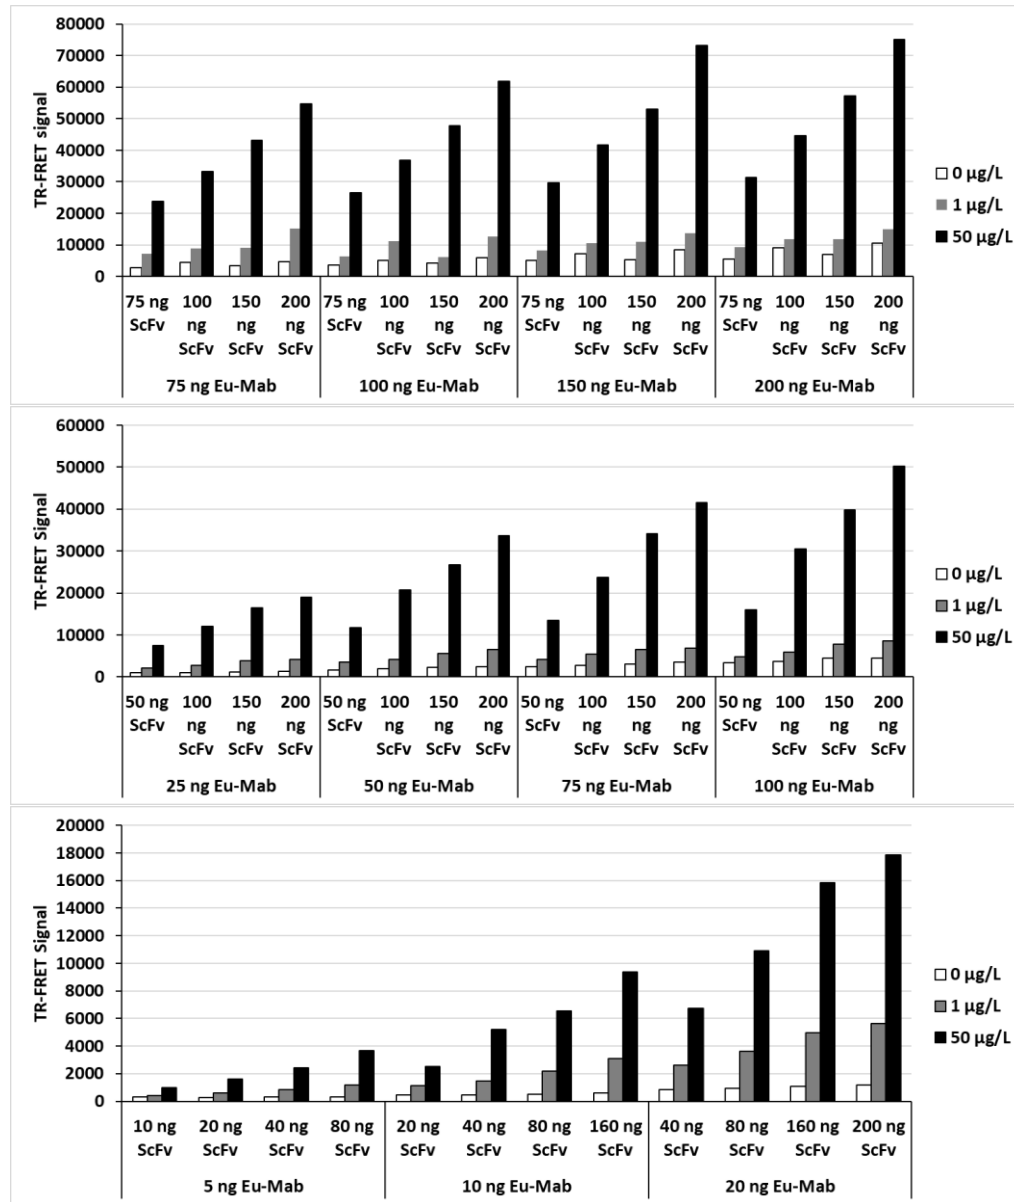**b**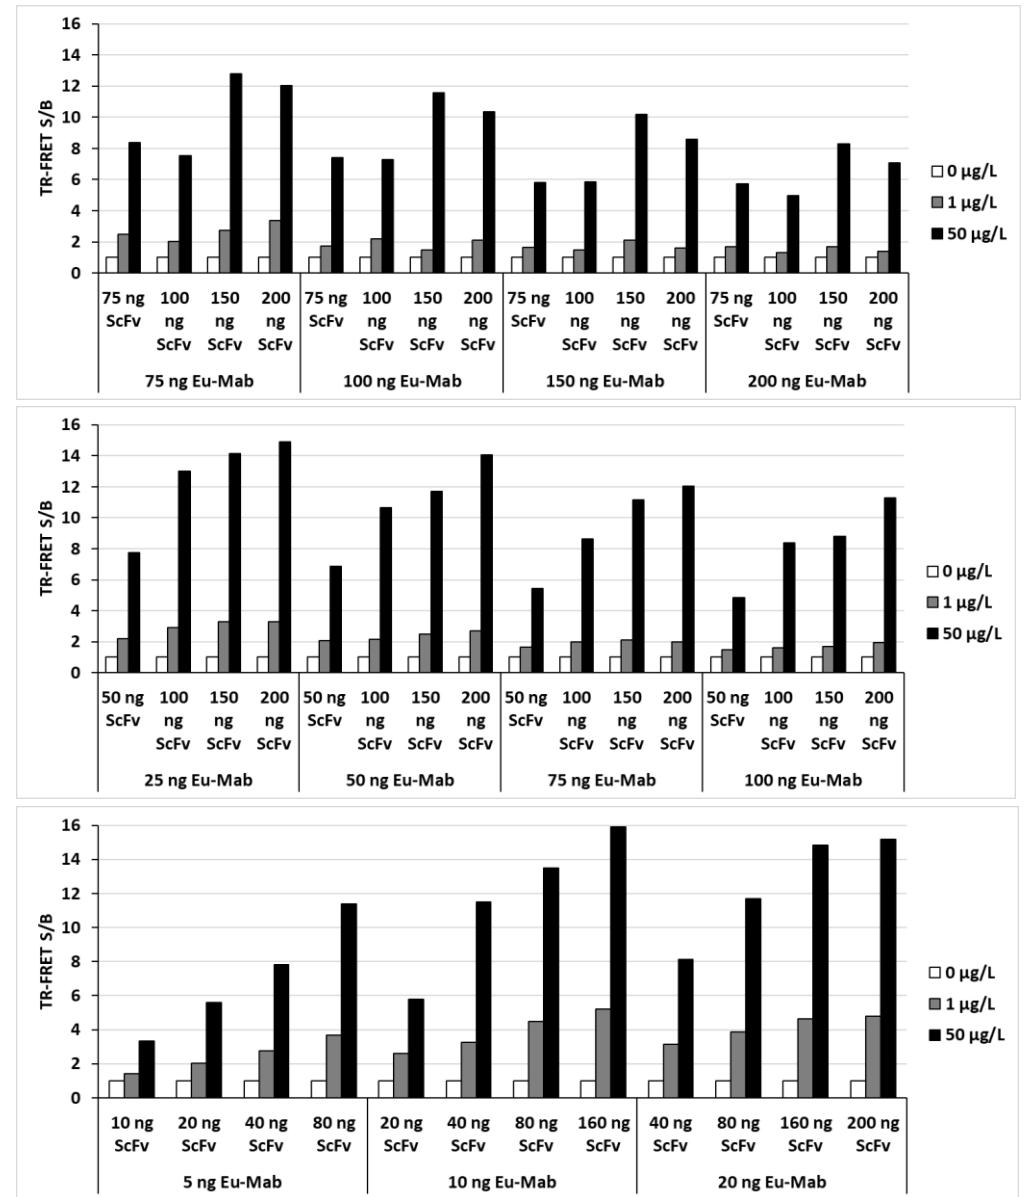

**Fig. S1** Optimization of Eu-adda-Mab and AF680-scFv-AP in the homogeneous assay.

Column **a** shows TR-FRET signal (average of two replicate measurements) of the sensitized emission of AF680 in the Y axis against the varying amount of Eu-adda-Mab ( 5-200 ng/well) and AF680-scFv-AP (10-200 ng/well) in presence of 0, 1 or 50  $\mu\text{g/L}$  of microcystin-LR (MC-LR) in 100  $\mu\text{L}$  reaction well (x axis).

Column **b** shows the corresponding TR-FRET signal to blank ratio (S/B) of the sensitized emission of AF680 in the Y axis against the varying amount of Eu-adda-Mab ( 5-200 ng/well) and AF680-scFv-AP (10-200 ng/well) in presence of 0, 1 or 50  $\mu\text{g/L}$  of microcystin-LR (MC-LR) in 100  $\mu\text{L}$  reaction well (x axis).
